# Supplementary material for: Piloting an International Comparison of Readily Accessible Online English Language Advice Surrounding Responsible Cat Ownership
Source: MDPI journal article supplement (doi:10.3390/ani13152434), 2023-07-27
Supplement: s1 [file s1]

## Supplementary Material S1

URL list for the 58 different webpages. Where a webpage only occurred in a search from one country, that country is shown in a superscript after the relevant url.

1. <https://kb.rspca.org.au/knowledge-base/how-can-i-be-a-responsible-cat-owner/>
2. <https://www.dlgsc.wa.gov.au/local-government/community/cats-and-dogs/laws-for-responsible-cat-owners>
3. <https://www.claremont.wa.gov.au/MediaLibrary/TownOfClaremont/Documents/WESROC-Cat-Ownership-Brochure.pdf>
4. <https://www.joondalup.wa.gov.au/wp-content/uploads/2017/12/Responsible-Cat-Ownership.pdf>
5. <https://www.rspcansw.org.au/blog/animal-care-information/cat-owner-top-tips/>
6. [https://www.bassendean.wa.gov.au/Profiles/bassendean/Assets/ClientData/Document-Centre/Rangers/Responsible\\_Cat\\_Ownership\\_Information\\_Sheet.pdf](https://www.bassendean.wa.gov.au/Profiles/bassendean/Assets/ClientData/Document-Centre/Rangers/Responsible_Cat_Ownership_Information_Sheet.pdf)
7. <https://www.wandering.wa.gov.au/my-property-business/animal-information/responsible-cat-owners.aspx> <sup>(AUS)</sup>
8. <https://www.cockburn.wa.gov.au/Responsible-Cat-Ownership-And-Nuisance-Cats>
9. <https://www.ava.com.au/policy-advocacy/policies/companion-animals-management-and-welfare/the-responsible-ownership-of-dogs-and-cats-and-the-human-animal-bond/>
10. <https://vcahospitals.com/know-your-pet/responsible-cat-ownership>
11. <https://www.sunshinecoast.qld.gov.au/Living-and-Community/Animals-and-Pets/Responsible-Cat-Ownership>
12. <https://agriculture.vic.gov.au/livestock-and-animals/animal-welfare-victoria/cats/legal-requirements-for-cat-owners>
13. <https://www.nedlands.wa.gov.au/responsible-cat-ownership-western-suburbs> <sup>(AUS)</sup>
14. [https://www.wanneroo.wa.gov.au/info/20006/animals\\_and\\_pets/70/owning\\_a\\_cat](https://www.wanneroo.wa.gov.au/info/20006/animals_and_pets/70/owning_a_cat) <sup>(AUS)</sup>
15. <https://animoz.world/stories/how-to-be-a-responsible-cat-owner-in-australia/> <sup>(AUS)</sup>
16. <https://www.environment.gov.au/biodiversity/threatened/publications/protecting-our-wildlife-responsible-pet-ownership> <sup>(AUS)</sup>
17. <https://www.belmont.wa.gov.au/live/at-your-place/pets-and-animals/cat-ownership-rules-and-management> <sup>(AUS)</sup>
18. <https://www.thesprucepets.com/cats-4162124>
19. <https://www.moretonbay.qld.gov.au/Services/Animals/Cats>
20. <https://frontlinepetcare.com.au/responsible-cat-ownership> <sup>(AUS)</sup>
21. <https://pawesomecats.com/responsible-cat-ownership/>
22. <https://www.catwelfare.org/responsible-cat-ownership/>
23. <https://www.avma.org/resources-tools/pet-owners/responsible-pet-ownership> <sup>(USA)</sup>
24. <https://figopetinsurance.com/blog/cat-ownership-101-guide-new-cat-parents> <sup>(USA)</sup>
25. <https://www.rover.com/blog/10-tips-help-become-best-cat-owner/> <sup>(USA)</sup>
26. <https://ottawahumane.ca/your-pet/animal-tips/cat-owners-responsibilities/> <sup>(USA)</sup>
27. <https://www.medivet.co.uk/pet-care/pet-advice/responsible-cat-owner/>
28. <https://www.ncbi.nlm.nih.gov/pmc/articles/PMC6769723/>
29. <https://www.cbcity.nsw.gov.au/resident/animals-pets/owning-a-pet/responsible-cat-ownership>
30. <https://catprotection.org.au/responsible-cat-ownership/>
31. <https://www.aucklandcouncil.govt.nz/dogs-animals/keeping-other-animals/keeping-cats/Pages/be-responsible-cat-owner.aspx>
32. [https://www.researchgate.net/publication/255522729\\_Attitudes\\_toward\\_Responsible\\_Pet\\_Ownership\\_Behaviors\\_in\\_Singaporean\\_Cat\\_Owners](https://www.researchgate.net/publication/255522729_Attitudes_toward_Responsible_Pet_Ownership_Behaviors_in_Singaporean_Cat_Owners)
33. <https://www.cityservices.act.gov.au/pets-and-wildlife/domestic-animals/cats/your-responsibilities>
34. <https://www.sPCA.nz/advice-and-welfare/article/responsible-cat-ownership>
35. <https://www.kingborough.tas.gov.au/services/animal-management-2/cats-2/responsible-cat-ownership/>

36. [https://www.halifax.ca/sites/default/files/documents/home-property/animal-services/RespCatOwnership\\_RackCard2017\\_fileforWeb.pdf](https://www.halifax.ca/sites/default/files/documents/home-property/animal-services/RespCatOwnership_RackCard2017_fileforWeb.pdf)
37. <https://www.cats.org.uk/help-and-advice/getting-a-cat/cats-and-the-law> <sup>(GBR)</sup>
38. <https://www.nidirect.gov.uk/articles/welfare-cats-introduction> <sup>(GBR)</sup>
39. <http://www.thecatgroup.org.uk/pdfs/Cats-law-web.pdf> <sup>(GBR)</sup>
40. <https://www.scottishwildcattaction.org/supercat/take-the-pledge/> <sup>(GBR)</sup>
41. <https://wildlifescience.org/portfolio/domestic-cats/> <sup>(GBR)</sup>
42. <https://www.innerwest.nsw.gov.au/live/information-for-residents/dogs-and-cats/cats/being-a-responsible-cat-owner> <sup>(GBR)</sup>
43. <https://www.brisbane.qld.gov.au/community-and-safety/pets-and-livestock/keeping-a-pet-in-brisbane/keeping-a-cat>
44. <https://esajournals.onlinelibrary.wiley.com/doi/full/10.1002/fee.2254>
45. <https://agriculture.vic.gov.au/livestock-and-animals/animal-welfare-victoria/community-and-education/responsible-cat-ownership-course>
46. <https://www.mdpi.com/2076-2615/9/9/703>
47. <https://veteducation.com.au/responsible-cat-ownership-to-reduce-cat-impacts-on-wildlife/>
48. <https://www.nzva.org.nz/resource/companion-animal/cat-ownership/>
49. <https://wellington.govt.nz/-/media/your-council/plans-policies-and-bylaws/plans-and-policies/a-to-z/domestic-animals/animal-cat-factsheet.pdf>
50. [https://www.cityservices.act.gov.au/\\_\\_data/assets/pdf\\_file/0019/1435006/Cat-ownership-factsheet-2015.pdf](https://www.cityservices.act.gov.au/__data/assets/pdf_file/0019/1435006/Cat-ownership-factsheet-2015.pdf)
51. <https://www.newzealandnow.govt.nz/resources/owning-a-cat> <sup>(NZ)</sup>
52. <https://communitylaw.org.nz/community-law-manual/chapter-27-neighbourhood-life/dogs-and-other-animals/cats-care-and-control-of-your-cat/> <sup>(NZ)</sup>
53. <https://www.forestandbird.org.nz/resources/responsible-pet-ownership-guide> <sup>(NZ)</sup>
54. [https://www.forestandbird.org.nz/sites/default/files/2018-05/CatFactsheet\\_forestandbird.pdf](https://www.forestandbird.org.nz/sites/default/files/2018-05/CatFactsheet_forestandbird.pdf) <sup>(NZ)</sup>
55. <https://www.brokenhill.nsw.gov.au/Services/Pets-and-animals/Responsible-Cat-Ownership> <sup>(NZL)</sup>
56. <https://www.narrogin.wa.gov.au/live/services/ranger-services/responsible-cat-ownership.aspx> <sup>(NZ)</sup>
57. <https://www.maranoa.qld.gov.au/downloads/file/1036/responsible-cat-ownership>
58. [https://karratha.wa.gov.au/sites/default/files/uploads/CATS\\_Responsible-Cat-Ownership-web.pdf](https://karratha.wa.gov.au/sites/default/files/uploads/CATS_Responsible-Cat-Ownership-web.pdf)
